# Supplementary material for: Temperature Shift and Host Cell Contact Up-Regulate Sporozoite Expression of Plasmodium falciparum Genes Involved in Hepatocyte Infection
Source: PLoS Pathog. 2008 Aug 8;4(8):e1000121. doi: 10.1371/journal.ppat.1000121 (PMC2488394; doi:10.1371/journal.ppat.1000121)
Supplement: Table S2 — Primers used for Taqman RT-qPCR experiments. (0.01 MB PDF) [file ppat.1000121.s004.pdf]

Table S2. Primers used for Taqman RT-qPCR experiments

| Gene                     | Real time PCR forward primer  | Real time PCR reverse primer  | Taqman® probe                      |
|--------------------------|-------------------------------|-------------------------------|------------------------------------|
| <i>P. falciparum</i> 18S | CTTTTGAGAGGTTTTGTTACTTTGAGTAA | TATTCCATGCTGTAGTATTCAAACACAA  | TCATAACAGACGGGTAGTCATGATTGAGTTC    |
| MAL8P1.6                 | TTTATTTTCCCCTTGACGTGTAAA      | GTCCTGATATAAGAGCAAATTTCTT     | AGGATTATGGGAAGGAATGGGTTAAGGATAAA   |
| PFL0065w/ LSAP-1         | ACACTGCCTATTGAATATTTTCGATT    | GCACATACAGCTGATAAAATAATTAAGTG | TGAAACCCTCAAAGAAAATGTCAAATTCG      |
| MAL8P1.17                | TGGTACATTAAATGAAACCCCAATAA    | GGAACCAGCCTTGACAAAGAA         | TTTCGAATGGTCTGGATTCCCAACCAT        |
| MAL7P1.150               | CCAAATATCAGATTAAATGCCTTAATCC  | GCCAAAACCAACAATTAATGAGTT      | TGGAGGTGGCCAAGAAAGAGGATTAAGATC     |
| PFB0105c / LSAP-2        | TGGCATTATAGTCATTCTCTTTTGA     | CATTTCCACCATTTCCTCATTTT       | TGAAAAGTTCGTTATGGAGTATTTGTGGGAA    |
| PFA0245w                 | CGGCAGCATTTTTATTACCTTTA       | ACCATTCCGCTTGCATTATT          | TGAAACAACAAAACATACCAATGCTGAAGGT    |
| MAL6P1.157               | GATATGTGGACCTTGCTATATCATT     | ATTCATGTTTCGCAGGCAATATATAA    | AGGGAGGAGCCAAAATTGATATATGGGATTA    |
| PF07_0126                | TGTAATGGGCAACTTATCTTCTGA      | ATATAGTCCTCATATTGGGAAAATTGG   | CTTTTCGCCATGTTGGATAAATGTAGCAATAAA  |
| PFI0580c                 | GACCAATCCAGTACCTATAC CTAAAAA  | CTGTTCTCTGGGCTTAGGAAAA        | AAACAAGATGGAAGTCAAATAACACCACAACA   |
| PF14_0678                | GATCAATGTACCATCGCTGTTTAC      | GTTTCTGCATTCAATTAATATACCGTGTA | AACACATTAAATGCCGTAGAATCCAAACCA     |
| PFE0355c                 | GATAAAGGATCTGCCGAATG          | CTCTTAGTTTCAATGTATATGGAGATG   | TCTCCTTCCGCATCTACATTTACTTCCAT      |
| PFI0135c                 | GTTTCATGGACAAAGTGGAGAAAC      | GTAACAGCTCCTCTGTTTGAATC       | ACCTTCACAACCTTCGATCTACCGCTAATCA    |
| PF08_0054                | AAGGTACCACAAATCGAAGTTACATTC   | CGTTGGTAATTGTAATATGGTTTTGTTTA | ATATCGATGCTAACGGTATCTTAAACGT       |
| PF11_0344                | CATACATTGCTACTACTGCTTTGTC     | TGATTCTCTTTCGATTTCTTTCA       | CCCATCGAAGTTGAAAACAATTTTCCA        |
| PF14_0425                | GATTAGCAGAAAGATGCAAAGAGTATTA  | TGGCTGTGTCAATAACTAAACTGT      | AAGCTGGTGCAAGGTTTGCTAAATGGA        |
| PF13_0201                | GCATGTGCTGGACTTGCTTA          | TGCAGGTTCTCCGGCATA            | AAATTCGTAGTACCAGGAGCAGCAACACC      |
| PFD0425w / SIAP-1        | CCAAAATATTGCATAGGAAGCACAT     | AAACGAGCAGAATATTTATCTGAAGAGA  | AGACAAGTTTCCATTGAAGATATAGCAGGAAACC |
| PFD0430c                 | AAACGTAAGCACTTCATCTATTGAACA   | CCAGCACTTCCAAAACCAA           | TGGAGTTAGCGTAAAAGCAAAAATTCAAGCTC   |
| PF08_0005 / SIAP-2       | CTATTGCTACTGTTTATAATAACACAAGA | TTGACTCCTTCAAGTATTTTCAATTCT   | ATTTGGTTTAAAGCCCCTCTGAAGTACCA      |
| PFD0825c                 | ACCCTTTCTAAGTTCTCATGCCTAT     | TGTTATCATCAGAGTGTTCAAAGCA     | ACGAGCAACAAATTAACAGATTGAATGAGC     |
| PFL0085c                 | TTGAGATATCCCCAAGGAAA          | TTCTTCTCATCTGCACTATTTCATT     | AGGAGAAAATGTAATGGACGGAAATTTTG      |
| PFC0210c                 | TCCCCAT GTAGTGTAACCTTGTTG     | CACTGGAACATTTTCCATTT          | TTCAAGTTAGAATAAAGCCTGGCTCTGCT      |
| PFL0800c                 | CAGAAGTAAAAAACACGCAAAATC      | TTGGTGTTTAAACATTTTCAGCTA      | TCAAAGTAGGATTGCCATCATTGCAAAATC     |
